# Supplementary material
Source: MDPI journal article supplement (https://www.mdpi.com/2077-0472/13/9/1655)
Supplement: s1 [file s1]

## Supplementary

**Table S1.** EFA results (% of variance accounted for), constructs, and individual scores and loadings.

| SEM level / Construct description                                                                                             | Items                                                                                             | Mean score | SD   | Factor loadings |
|-------------------------------------------------------------------------------------------------------------------------------|---------------------------------------------------------------------------------------------------|------------|------|-----------------|
| Organizational                                                                                                                | Factor 1 (8.95%)                                                                                  |            |      |                 |
| Management perception<br>Sense of workplace belonging and pride<br>Trust in management as a source of safety information      | My employer provides adequate protective equipment                                                | 4.48       | 0.75 | 0.81            |
|                                                                                                                               | Management is heading the farm in the right direction                                             | 4.49       | 0.76 | 0.71            |
|                                                                                                                               | Management is honest and open with me                                                             | 4.40       | 0.74 | 0.71            |
|                                                                                                                               | I feel that the farm problems are my problems too                                                 | 3.77       | 1.37 | 0.71            |
|                                                                                                                               | Farm management provides accurate safety information                                              | 4.18       | 1.03 | 0.70            |
|                                                                                                                               | Farm management provides adequate safety training                                                 | 4.18       | 1.08 | 0.61            |
|                                                                                                                               | I am proud to tell others I work here                                                             | 4.56       | 0.59 | 0.61            |
|                                                                                                                               | Help is available from my coworkers when I have an inquiry about safety                           | 4.29       | 1.08 | 0.57            |
|                                                                                                                               | I feel that I belong on this farm                                                                 | 3.85       | 1.10 | 0.55            |
|                                                                                                                               | Diseases prevention knowledge                                                                     | 0.65†      | 0.30 | -0.55           |
|                                                                                                                               | What is the definition of cleanliness (correct=1, incorrect=0)                                    | 0.98†      | 1.13 | -0.54           |
|                                                                                                                               | Easiness of adoption of new preventive practices                                                  | 3.80       | 1.11 | 0.51            |
| Intrapersonal                                                                                                                 | Factor 2 (8.63%)                                                                                  |            |      |                 |
| Knowledge about zoonotic diseases<br>Risks perception<br>Attitudes toward reporting illness<br>Perception of work performance | Cattle can transmit diseases to humans                                                            | 0.76*      | 0.62 | 0.91            |
|                                                                                                                               | Zoonotic diseases can cause serious health problems                                               | 0.73*      | 0.62 | 0.88            |
|                                                                                                                               | How long would it take you to report to your supervisor? – If flu symptoms                        | 3.67       | 0.84 | 0.76            |
|                                                                                                                               | How long would it take you to go to the doctor? – If flu symptoms                                 | 3.22       | 1.01 | 0.74            |
|                                                                                                                               | Zoonotic diseases from cattle can harm workers permanently                                        | 0.50*      | 0.63 | 0.59            |
|                                                                                                                               | How much risk does it represent to you? – Zoonotic diseases, in general                           | 3.41       | 1.07 | 0.59            |
|                                                                                                                               | How much risk does it represent to your family? – Zoonotic diseases, in general                   | 3.44       | 1.18 | 0.58            |
|                                                                                                                               | How concerned are you that your family can get an infectious disease from your workplace?         | 3.15       | 1.53 | 0.56            |
|                                                                                                                               | I know what my boss considers a satisfactory work performance                                     | 4.15       | 1.11 | -0.51           |
|                                                                                                                               | How long would it take you to report to your supervisor? – If gastrointestinal infection symptoms | 3.77       | 0.58 | 0.50            |
|                                                                                                                               | How much risk does it represent to you? – The contact with a sick animal                          | 3.44       | 1.36 | 0.46            |
|                                                                                                                               | How afraid are you that you can get an infectious disease at work?                                | 2.71       | 1.42 | 0.42            |
| Intrapersonal                                                                                                                 | Factor 3 (8.02%)                                                                                  |            |      |                 |
| Self-efficacy                                                                                                                 | I am confident about my ability to perform my job tasks                                           | 4.63       | 0.58 | 0.82            |
| Self-confidence                                                                                                               | How do you grade your quality of work?                                                            | 8.63‡      | 1.36 | 0.81            |

|                                                                |                                                                                                        |       |      |      |
|----------------------------------------------------------------|--------------------------------------------------------------------------------------------------------|-------|------|------|
|                                                                | How would you rate your interest in the prevention of diseases at work?                                | 4.78  | 0.57 | 0.80 |
|                                                                | I have the skills necessary to implement preventive practices                                          | 4.12  | 0.84 | 0.73 |
|                                                                | How do you grade your ability to meet technical demands?                                               | 8.78† | 1.44 | 0.69 |
|                                                                | I am confident about my ability to implement preventive practices                                      | 4.07  | 0.93 | 0.69 |
|                                                                | How easy is it to comply with work safety recommendations?                                             | 4.76  | 0.58 | 0.63 |
|                                                                | Grade the quality of communication with top Management                                                 | 3.92  | 1.04 | 0.63 |
|                                                                | Management has my best interest in mind                                                                | 4.15  | 1.08 | 0.57 |
|                                                                | How easy would it be for the group to adopt a new preventive practice                                  | 3.80  | 1.11 | 0.50 |
| Interpersonal                                                  | Factor 4 (7.38%)                                                                                       |       |      |      |
| Communication and relationships with supervisors and coworkers | How likely are you to report to your supervisors if you see that a coworker is ill?                    | 4.37  | 1.04 | 0.77 |
|                                                                | My supervisors encourage the use of PPE                                                                | 4.40  | 0.98 | 0.70 |
|                                                                | How likely are you to report to your supervisor if you have a fever?                                   | 4.37  | 0.97 | 0.69 |
|                                                                | My supervisors show much concern about my safety                                                       | 4.71  | 0.51 | 0.67 |
|                                                                | My coworkers show much concern about my safety                                                         | 4.08  | 1.12 | 0.62 |
|                                                                | My supervisors are knowledgeable about how to wear PPE correctly                                       | 4.73  | 0.45 | 0.62 |
|                                                                | Others at work care whether I wear or not PPE                                                          | 3.97  | 1.32 | 0.55 |
|                                                                | Grade the quality of communication with your coworkers                                                 | 4.26  | 0.94 | 0.55 |
| Intrapersonal                                                  | Factor 5 (7.37%)                                                                                       |       |      |      |
| Reporting and seeking health care due to injuries              | How likely are you to report to your supervisor if you have a sprained/twisted wrist?                  | 4.61  | 0.92 | 0.92 |
|                                                                | How likely are you to go to the doctor if you have a wound with moderate bleeding?                     | 4.80  | 0.72 | 0.88 |
|                                                                | How likely are you to report to your supervisor if you have a wound with moderate bleeding?            | 4.76  | 0.70 | 0.86 |
|                                                                | How likely are you to report to your supervisor if you have vomit?                                     | 4.22  | 1.19 | 0.73 |
|                                                                | How likely are you to report to your supervisor if you have diarrhea?                                  | 4.15  | 1.28 | 0.68 |
|                                                                | How likely are you to go to the doctor if you have a sprained/twisted wrist?                           | 4.43  | 0.93 | 0.68 |
|                                                                | I am satisfied with my job                                                                             | 4.78  | 0.42 | 0.56 |
| Intrapersonal                                                  | Factor 6 (6.89%)                                                                                       |       |      |      |
| Reporting and seeking health care due to infections symptoms   | How likely are you to go to the doctor if you have diarrhea?                                           | 3.00  | 1.40 | 0.84 |
|                                                                | How likely are you to go to the doctor if you have a fever?                                            | 3.37  | 1.43 | 0.82 |
|                                                                | How likely are you to go to the doctor if you have vomit?                                              | 3.03  | 1.54 | 0.78 |
|                                                                | If you have intestinal infection symptoms, how long would it take you to decide to go to the doctor? - | 3.75  | 0.54 | 0.70 |
|                                                                | How likely are you to go to the doctor if you have a fever and sore throat?                            | 3.18  | 1.32 | 0.67 |
|                                                                | How likely are you to go to the doctor if you have a sore throat?                                      | 2.70  | 1.30 | 0.67 |

|                                                                                                                                        |                                                                                                  |       |      |       |
|----------------------------------------------------------------------------------------------------------------------------------------|--------------------------------------------------------------------------------------------------|-------|------|-------|
|                                                                                                                                        | How likely are you to go to the doctor if you have flu-like symptoms?                            | 3.21  | 1.40 | 0.66  |
|                                                                                                                                        | How likely are you to go to the doctor if you have intestinal infection symptoms?                | 4.08  | 1.07 | 0.49  |
| Intrapersonal/organizational                                                                                                           | Factor 7 (6.67%)                                                                                 |       |      |       |
| Trust in management<br>Job satisfaction                                                                                                | Reporting my health problems would get me in trouble with my supervisors                         | 1.76  | 1.59 | -0.88 |
|                                                                                                                                        | Help is available from the managers when I have an inquiry about safety                          | 4.78  | 0.42 | 0.73  |
|                                                                                                                                        | I like working here                                                                              | 4.76  | 0.43 | 0.70  |
|                                                                                                                                        | I am satisfied with my job                                                                       | 4.78  | 0.42 | 0.65  |
|                                                                                                                                        | From your point of view, how many of your coworkers think wearing PPE does not serve any purpose | 2.38  | 1.37 | -0.62 |
|                                                                                                                                        | Attendants to training are involved in training activities/demonstrations                        | 2.74  | 1.60 | 0.58  |
|                                                                                                                                        | I am proud to tell others I work here                                                            | 4.56  | 0.59 | 0.61  |
| Interpersonal/Organizational                                                                                                           | Factor 8 (6.20%)                                                                                 |       |      |       |
| Role ambiguity<br>Supervision<br>knowledge perception<br>and communication<br>quality<br>Attitudes toward<br>safety<br>recommendations | Which of the following vaccines are strongly recommended for dairy farmworkers?                  | 0.33† | 0.33 | -0.83 |
|                                                                                                                                        | It is clear to me what are my duties at work                                                     | 4.73  | 0.63 | 0.77  |
|                                                                                                                                        | What is the highest degree or level of school you have completed?                                | 2.12  | 1.19 | -0.60 |
|                                                                                                                                        | My supervisors are knowledgeable about safety at work                                            | 4.68  | 0.57 | 0.58  |
|                                                                                                                                        | I have received clear instructions on how to use PPE adequately                                  | 4.36  | 1.27 | 0.55  |
|                                                                                                                                        | Grade the quality of communication with your supervisor                                          | 4.26  | 0.99 | 0.52  |
| Interpersonal/organizational                                                                                                           | Factor 9 (5.79%)                                                                                 |       |      |       |
| Training perceptions<br>Role conflict<br>Help availability from<br>management on safety                                                | I believe that training sessions are a waste of time                                             | 4.59  | 1.04 | -0.81 |
|                                                                                                                                        | How often is the training given in the language of your preference?                              | 4.07  | 1.21 | -0.72 |
|                                                                                                                                        | Upper management makes conflicting demands on me                                                 | 2.46  | 1.31 | 0.61  |
|                                                                                                                                        | Help is available from the organization when I have an inquiry about safety                      | 4.29  | 1.05 | -0.61 |
|                                                                                                                                        | How afraid are you that you can get an infectious disease at work?                               | 2.71  | 1.42 | 0.53  |
|                                                                                                                                        | I like working here                                                                              | 4.76  | 0.43 | -0.52 |
| Interpersonal/Organizational                                                                                                           | Factor 10 (5.04%)                                                                                |       |      |       |
| Role overload<br>Job control<br>Reporting health issues<br>to the supervisor                                                           | I am always rushing to do my job                                                                 | 2.27  | 1.30 | 0.85  |
|                                                                                                                                        | At my job, I have the freedom to decide how I work                                               | 3.32  | 1.57 | -0.72 |
|                                                                                                                                        | How likely are you to report to your supervisor if you have the following symptoms - Coughing    | 3.66  | 1.41 | 0.63  |
|                                                                                                                                        | How afraid are you that you can get an infectious disease at work?                               | 2.71  | 1.42 | 0.55  |

|                                                                                                  |      |      |      |
|--------------------------------------------------------------------------------------------------|------|------|------|
| At work, I feel discriminated                                                                    | 1.60 | 0.81 | 0.51 |
| How likely are you to report to your supervisor if you have the following symptoms - Sore throat | 3.61 | 1.32 | 0.50 |

The majority of the scores presented are based on the average responses to Likert-type questions, which used a 5-point scale (ranging from 1 to 5). For other scores, they adhere to specific scales as follows:

† Bivariate answer question: Each correct answer is assigned a score of 1, while an incorrect answer receives a score of 0.

\* True/false question: A true answer is scored as 1, a false answer as -1, and when unsure, a score of 0 is assigned.

‡ Scale question: Responses to scale questions are measured on a scale from 1 to 10.
